# Supplementary material for: A genetic basis for molecular asymmetry at vertebrate electrical synapses
Source: eLife. 2017 May 22;6:e25364. doi: 10.7554/eLife.25364 (PMC5462537; doi:10.7554/eLife.25364)
Supplement: Figure 1—source data 1. — DOI: http://dx.doi.org/10.7554/eLife.25364.003 [file elife-25364-fig1-data1.xlsx]

## Sheet: Fig1 dis3_gjd1a comp test
Fig. 1	M/CoLo - spinal cord
gjd1adis3/+ X gjd1aΔ8bp/+
		anti-Cx36						anti-Cx36 - NORMALIZED to wt average
		wt	gjd1a dis3 / +	gjd1a Δ8bp / +	gjd1a dis3 / Δ8bp			wt	gjd1a dis3 / +	gjd1a Δ8bp / +	gjd1a dis3 / Δ8bp
	avg. for animal	10.45	8.62	10.95	0.05		avg. for animal	0.820251	0.676609	0.859498	0.00392465
		10.78	7.21	14.85	0.11			0.846154	0.565934	1.16562	0.00863422
		12.86	7.56	12.29	0.05			1.00942	0.593407	0.964678	0.00392465
		13.62	7.4	9.14	0.04			1.06907	0.580848	0.717425	0.00313972
		12.28	7.19	12.74	0.08			0.963893	0.564364	1	0.00627943
		16.45	7.05	12.32	0.06			1.29121	0.553375	0.967033	0.00470958
			6.6	12.26	0.07				0.518053	0.962323	0.00549451
	avg.	12.74	7.37571	12.0786	0.0657143		avg.	1	0.578941	0.948083	0.00515811
	stdev	2.18404	0.626175	1.73988	0.0237045		stdev	0.171432	0.0491503	0.136568	0.00186064
	sterr	0.891631	0.236672	0.657613	0.00895947		sterr	0.0699868	0.0185771	0.0516179	0.000703255
	n	6	7	7	7		n	6	7	7	7
	- each avg. for animal represents 12-16 individual M/CoLo synapses
