# Supplementary material for: A genetic basis for molecular asymmetry at vertebrate electrical synapses
Source: eLife. 2017 May 22;6:e25364. doi: 10.7554/eLife.25364 (PMC5462537; doi:10.7554/eLife.25364)
Supplement: Figure 2—source data 1. — DOI: http://dx.doi.org/10.7554/eLife.25364.005 [file elife-25364-fig2-data1.xlsx]

## Sheet: Fig2 gjd_cx alleles
Fig. 2	chr	gene	Ensembl ID	protein	mutations	nucleotide change	wt sequence #1	mutant sequence #1	wt sequence #2	mutant sequence #2	predicted consequence	notes
	5	gjd1a	ENSDARG00000035340	Cx34.1	fh360 (dis3)	K215Q, R290C	CGTGAAGGAGGTTGAATGTTACGTG	CGTGCAGGAGGTTGAATGTTACGTG	TGGGCCGCACCCAGTCTAGCGAATC	TGGGCTGCACCCAGTCTAGCGAATC	two amino acid changes	The ENU mutagensis produced two missense mutations in gjd1a. We have not resolved causation to one or both mutations.
					fh436	Δ8bp starting at nt 5	ATGGGAGAATGGACTATATTGGAGA	ATGGACTATATTGGAGAGGTTGCTG			encodes an entirely different, frame-shifted, peptide truncating after 43aas
	15	gjd1b	ENSDARG00000035765	Cx34.7	fh435 (Δ8bp)	Δ8bp starting at nt 2	ATGGGAGAGTGGACCATTTTAGAGC	ATGGACCATTTTAGAGCGCCTCCTG			encodes an entirely different, frame-shifted, peptide truncating after 34aas
	17	gjd2a	ENSDARG00000067999	Cx35.5	fh437 (Δ5bp)	Δ5bp starting at nt 20	ATGGGAGAATGGACCATACTAGAGA	ATGGGAGAATGGACCATACAGGCTC			change at L7Q followed by frame-shifted peptide truncating after 42aas	The contigs of the genome are misalgned in this region of GRCz10. On Ensembl only exon2 is annotated. Exon 1 is present but is found downstream of exon 2. However, a full length, exon1-exon2 cDNA was cloned from an RNA library.
	20	gjd2b	ENSDARG00000070781	Cx35.1	fh329	G42*	TTGTTGGAGAGACCGTGTACGACGA	TTGTTTGAGAGACCGTGTACGACGA			truncated after first transmembrane domain
					fh454	Δ12bp starting in 5'UTR and deleting A of ATG	ATTCGCCTCCGAATGAACAGCCATG	TCTCTGTGTTACATTCGCCTCCGTG			nearest ATG is 7bp downstream and would encode a entirely different, frame-shifted, peptide truncating after 53aas
	- underlined sections of wt sequence denote nucleotides that are effected in mutant sequence
	- start codons are in bold
	- aa = amino acid
