# Supplementary material for: A genetic basis for molecular asymmetry at vertebrate electrical synapses
Source: eLife. 2017 May 22;6:e25364. doi: 10.7554/eLife.25364 (PMC5462537; doi:10.7554/eLife.25364)
Supplement: Figure 3—source data 1. — DOI: http://dx.doi.org/10.7554/eLife.25364.007 [file elife-25364-fig3-data1.xlsx]

## Sheet: Fig3 gjd_cx mutants
Fig.3	M/CoLo - spinal cord										Aud/M - club ending, hindbrain
gjd1afh436 Δ8bp incross	gjd1a 8bp (fh436) het incross
		anti-Cx36 - RAW pixel values					anti-Cx36 - NORMALIZED to wt avg.					anti-Cx36 - RAW pixel values					anti-Cx36 - NORMALIZED to wt avg.
		wt	gjd1a Δ8bp / +	gjd1a Δ8bp / Δ8bp			wt	gjd1a Δ8bp / +	gjd1a Δ8bp / Δ8bp			wt	gjd1a Δ8bp / +	gjd1a Δ8bp / Δ8bp			wt	gjd1a Δ8bp / +	gjd1a Δ8bp / Δ8bp
	avg. for animal	17.65	21.72	0.25		avg. for animal	1.15388	1.41996	0.0163439		avg. for animal	27.6255	15.624	4.8544		avg. for animal	1.06634	0.603081	0.187379
		10.28	3.97	0.17			0.67206	0.259541	0.0111138			13.2691	16.7302	5.83531			0.512182	0.645781	0.225241
		12.69	14.63	0.36			0.829615	0.956444	0.0235352			26.9367	24.8592	13.0492			1.03975	0.959558	0.503695
		19.29	18.26	1.02			1.26109	1.19376	0.066683			26.6027	30.3725	11.2688			1.02686	1.17237	0.434971
		16.35	14.72	0.44			1.06889	0.962327	0.0287652			24.5052	29.4401	4.87465			0.945894	1.13638	0.18816
		15.45	17.72	0.19			1.01005	1.15845	0.0124213			28.859	22.8383	2.58189			1.11395	0.881553	0.0996604
		20.07	13.34	1.07			1.31209	0.872109	0.0699518			25.4766	17.1251	6.57751			0.983389	0.661025	0.25389
		10.59	21.33				0.692327	1.39446				33.9805	29.7905				1.31164	1.14991
	avg.	15.2963	15.7112	0.5		avg.	1	1.02713	0.0326878		avg.	25.9069	23.3475	7.00596		avg.	1	0.901207	0.270428
	stdev	3.77051	5.65481	0.384274		stdev	0.246499	0.369686	0.0251221		stdev	5.85859	6.24143	3.76364		stdev	0.22614	0.240917	0.145276
	sterr	1.33308	1.99928	0.145242		sterr	0.0871504	0.130704	0.00949527		sterr	2.07133	2.20668	1.42252		sterr	0.0799526	0.0851772	0.054909
	n	8	8	7		n	8	8	7		n	8	8	7		n	8	8	7
gjd1afh360 dis3 incross	gjd1a dis3 (fh360) het incross
		anti-Cx36 - RAW pixel values					anti-Cx36 - NORMALIZED to wt avg.					anti-Cx36 - RAW pixel values					anti-Cx36 - NORMALIZED to wt avg.
		wt	gjd1a dis3 / +	gjd1a dis3 /dis3			wt	gjd1a dis3 / +	gjd1a dis3 /dis3			wt	gjd1a dis3 / +	gjd1a dis3 /dis3			wt	gjd1a dis3 / +	gjd1a dis3 /dis3
	avg. for animal	12.06	5.78	2.34		avg. for animal	0.843534	0.404281	0.163671		avg. for animal	13.3207	20.661	6.40813		avg. for animal	0.660035	1.02375	0.31752
		16.78	8.72	0.88			1.17367	0.609918	0.0615514			19.4665	22.2458	5.96776			0.964557	1.10227	0.2957
		15.99	6.43	0.47			1.11842	0.449745	0.032874			26.4542	23.7649	6.45817			1.31079	1.17754	0.319999
		17.86	6.06	0.51			1.24921	0.423865	0.0356718			25.3997	14.9966	7.28586			1.25855	0.743077	0.361011
		10.14	9.19	0.33			0.70924	0.642792	0.0230818			21.5363	17.907	3.02922			1.06711	0.887286	0.150096
		10.33	5.64	1.05			0.722529	0.394488	0.073442			20.3745	14.1869	3.56242			1.00955	0.702953	0.176516
		10.43	9.27	0.91			0.729524	0.648388	0.0636497			20.7606	11.5233	2.83311			1.02868	0.570977	0.140379
		14.8	3.99	1.87			1.03518	0.27908	0.130797			24.0675	11.6527	1.58217			1.19253	0.577388	0.0783959
		15.77	7.74	2.18			1.10303	0.541372	0.15248			11.8867	11.241	4.0742			0.588983	0.556988	0.201875
		18.81	8.02	1.45			1.31566	0.560957	0.10142			18.5513		3.47655			0.919211		0.172262
	avg.	14.297	7.084	1.199		avg.	1	0.495489	0.0838637		avg.	20.1818	16.4644	4.46776		avg.	1	0.815803	0.221376
	stdev	3.29127	1.76482	0.726199		stdev	0.230207	0.12344	0.0507938		stdev	4.74842	4.8555	1.91322		stdev	0.235282	0.240588	0.0947991
	sterr	1.04079	0.558086	0.229644		sterr	0.0727978	0.0390352	0.0160624		sterr	1.50158	1.6185	0.605012		sterr	0.0744027	0.0801959	0.0299781
	n	10	10	10		n	10	10	10		n	10	9	10		n	10	9	10
gjd2afh437 Δ5bp incross	gjd2a 5bp (fh437) het incross
		anti-Cx36 - RAW pixel values					anti-Cx36 - NORMALIZED to wt avg.					anti-Cx36 - RAW pixel values					anti-Cx36 - NORMALIZED to wt avg.
		wt	gjd2a Δ5bp / +	gjd2a Δ5bp / Δ5bp			wt	gjd2a Δ5bp / +	gjd2a Δ5bp / Δ5bp			wt	gjd2a Δ5bp / +	gjd2a Δ5bp / Δ5bp			wt	gjd2a Δ5bp / +	gjd2a Δ5bp / Δ5bp
	avg. for animal	12.97	20.87	0.33		avg. for animal	0.475544	0.765198	0.0120994		avg. for animal	29.8076	17.985	0.4385		avg. for animal	0.898995	0.542425	0.0132251
		26.83	27.95	0.17			0.983721	1.02479	0.00623304			32.2895	18.9641	0.666982			0.973849	0.571957	0.0201161
		30.16	22.37	0.3			1.10582	0.820195	0.0109995			27.4603	21.5418	0.340497			0.828202	0.649699	0.0102694
		25.5	20.58	0.13			0.934956	0.754565	0.00476644			41.1264	29.2841	0.233732			1.24037	0.883207	0.00704933
		29.47	26.66	0.23			1.08052	0.977488	0.00843294			44.5549	30.8271	0.550244			1.34377	0.929743	0.0165953
		36.32	17.35	0.14			1.33167	0.636137	0.00513309			23.7008	23.4597	0.562962			0.714813	0.707541	0.0169789
		28.3	22	0.11			1.03762	0.806629	0.00403315
		22.33	22.63	0.4			0.818728	0.829728	0.014666
		24.84	20.96	0.29			0.910757	0.768497	0.0106328
		36.02	28.86	0.27			1.32067	1.05815	0.00989954
	avg.	27.274	23.023	0.237		avg.	1	0.844137	0.00868959		avg.	33.1566	23.677	0.465486		avg.	1	0.714095	0.014039
	stdev	6.75642	3.65519	0.0969593		stdev	0.247724	0.134017	0.00355501		stdev	8.09033	5.32504	0.159591		stdev	0.244004	0.160603	0.00481326
	sterr	2.13657	1.15587	0.0306612		sterr	0.0783372	0.04238	0.00112419		sterr	3.30286	2.17394	0.0651528		sterr	0.0996141	0.0655658	0.001965
	n	10	10	10		n	10	10	10		n	6	6	6		n	6	6	6
gjd1bfh435 Δ8bp incross	gjd1b 8bp (fh435) het incross
		anti-Cx36 - RAW pixel values					anti-Cx36 - NORMALIZED to wt avg.					anti-Cx36 - RAW pixel values					anti-Cx36 - NORMALIZED to wt avg.
		wt	gjd1b Δ8bp / +	gjd1b Δ8bp / Δ8bp			wt	gjd1b Δ8bp / +	gjd1b Δ8bp / Δ8bp			wt	gjd1b Δ8bp / +	gjd1b Δ8bp / Δ8bp			wt	gjd1b Δ8bp / +	gjd1b Δ8bp / Δ8bp
	avg. for animal	5.01	6.89	6.18		avg. for animal	0.79961	1.09966	0.986345		avg. for animal	22.7222	25.1134	24.8529		avg. for animal	0.748034	0.826753	0.818178
		5.82	7.76	5.96			0.928888	1.23852	0.951232			24.3093	33.5119	35.2988			0.800283	1.10324	1.16207
		5.09	6	5.45			0.812378	0.957617	0.869835			22.0406	20.1123	26.2736			0.725593	0.662113	0.864948
		6.11	5.32	4.49			0.975173	0.849087	0.716616			31.4223	27.7065	9.65195			1.03445	0.912121	0.31775
		6.12	5.93	5.14			0.976769	0.946444	0.820358			54.3245	12.7336	31.0144			1.78841	0.419201	1.02102
		7.52	5.11	6.54			1.20021	0.81557	1.0438			23.4472	47.9812	41.4035			0.771902	1.57958	1.36304
		7.18	6.92	7.37			1.14595	1.10445	1.17627			30.3088	22.8016	28.4518			0.99779	0.750649	0.936656
		6.39	5.89	6.18			1.01986	0.94006	0.986345			34.4325	11.397	27.8393			1.13354	0.375197	0.916492
		7.15					1.14116
	avg.	6.26556	6.2275	5.91375		avg.	1	0.993926	0.943851		avg.	30.3759	25.1697	28.0983		avg.	1	0.828607	0.925018
	stdev	0.895113	0.893912	0.886211		stdev	0.142863	0.142671	0.141442		stdev	10.7168	11.7833	9.19395		stdev	0.352807	0.387916	0.302672
	sterr	0.298371	0.316046	0.313323		sterr	0.0476209	0.0504418	0.0500072		sterr	3.78898	4.16603	3.25055		sterr	0.124736	0.137149	0.107011
	n	9	8	8		n	9	8	8		n	8	8	8		n	8	8	8
gjd2bfh329 G42* incross	gjd2b G42* (fh329) het incross
		anti-Cx36 - RAW pixel values					anti-Cx36 - NORMALIZED to wt avg.					anti-Cx36 - RAW pixel values					anti-Cx36 - NORMALIZED to wt avg.
		wt	gjd2b G42* / +	gjd2b G42* / G42*			wt	gjd2b G42* / +	gjd2b G42* / G42*			wt	gjd2b G42* / +	gjd2b G42* / G42*			wt	gjd2b G42* / +	gjd2b G42* / G42*
	avg. for animal	19.63	17.59	18.42		avg. for animal	1.14779	1.0285	1.07704		avg. for animal	9.62599	12.8972	15.4323		avg. for animal	0.575717	0.771364	0.922984
		13.02	16.44	12.71			0.761292	0.961263	0.743166			12.5473	34.0392	20.4741			0.750439	2.03584	1.22453
		12.02	16.04	16.4			0.702821	0.937875	0.958924			23.9406	17.9938	18.3233			1.43185	1.07619	1.09589
		14.59	18.27	15.82			0.853092	1.06826	0.925011			22.2597	30.7112	10.5293			1.33132	1.83679	0.629744
		12.4	14.99	17.32			0.72504	0.87648	1.01272			22.4458	30.6315	19.1989			1.34245	1.83203	1.14826
		24.6	19.1	13.64			1.43839	1.1168	0.797544			15.1467	18.6663	24.6847			0.905906	1.11641	1.47636
		17.68	15.42	11.7			1.03377	0.901623	0.684111			14.5562	12.7392	14.1335			0.870589	0.761916	0.845307
		22.88	15.77	13.16			1.33782	0.922087	0.769478			13.2376	22.9785	28.7089			0.791722	1.37432	1.71704
	avg.	17.1025	16.7025	14.8963		avg.	1	0.976612	0.870998		avg.	16.72	22.5821	18.9356		avg.	1	1.35061	1.13251
	stdev	4.88786	1.46129	2.41999		stdev	0.285798	0.085443	0.141499		stdev	5.38025	8.36114	5.82333		stdev	0.321786	0.500068	0.348286
	sterr	1.72812	0.516644	0.855595		sterr	0.101045	0.0302087	0.0500275		sterr	1.90221	2.95611	2.05886		sterr	0.113768	0.176801	0.123138
	n	8	8	8		n	8	8	8		n	8	8	8		n	8	8	8
gjd2bfh456 Δ12bp incross	gjd2b 12bp (fh454) het incross
		anti-Cx36 - RAW pixel values					anti-Cx36 - NORMALIZED to wt avg.					anti-Cx36 - RAW pixel values					anti-Cx36 - NORMALIZED to wt avg.
		wt	gjd2b Δ12bp / +	gjd2b Δ12bp / Δ12bp			wt	gjd2b Δ12bp / +	gjd2b Δ12bp / Δ12bp			wt	gjd2b Δ12bp / +	gjd2b Δ12bp / Δ12bp			wt	gjd2b Δ12bp / +	gjd2b Δ12bp / Δ12bp
	avg. for animal	n.d.	n.d.	n.d.		avg. for animal	n.d.	n.d.	n.d.		avg. for animal	29.49	43.29	28.68		avg. for animal	0.961004	1.41071	0.934608
												28.2	29	29.47			0.918966	0.945036	0.960352
												29.42	18.66	28.66			0.958723	0.608082	0.933956
												38.18		28.84			1.24419		0.939822
												34.58		28.47			1.12687		0.927765
												24.25		31.11			0.790245		1.0138
	avg.			***		avg.			***		avg.	30.6867	30.3167	29.205		avg.	1	0.987943	0.951716
	stdev					stdev					stdev	4.9388	12.3677	0.99452		stdev	0.160943	0.403031	0.0324089
	sterr					sterr					sterr	2.01626	7.14048	0.406011		sterr	0.0657047	0.23269	0.0132309
	n					n					n	6	3	6		n	6	3	6
	- for M/CoLo, each avg. for animal represents 12-16 individual M/CoLo synapses
	- for Aud/M, each avg. for animal represents 8-12 individual Aud/M synapses
	- n.d. = not determined
	*** cx35.1 12bp deletion homozygous mutants had no qualitative effect on spinal cord synapses
