# Supplementary material for: A genetic basis for molecular asymmetry at vertebrate electrical synapses
Source: eLife. 2017 May 22;6:e25364. doi: 10.7554/eLife.25364 (PMC5462537; doi:10.7554/eLife.25364)
Supplement: Figure 3—source data 2. — DOI: http://dx.doi.org/10.7554/eLife.25364.008 [file elife-25364-fig3-data2.xlsx]

## Sheet: Fig3 gjd_cx multimutants
Fig.3	Aud/M - club ending, hindbrain
		anti-Cx36 - RAW pixel values							anti-Cx36 - NORMALIZED to wt ave.
			gjd1a Δ8bp / Δ8bp							gjd1a Δ8bp / Δ8bp
		wt	gjd2a Δ5bp / Δ5bp	gjd1b Δ8bp / Δ8bp	gjd2b G42* / G42*	gjd1b Δ8bp / Δ8bp; gjd2b G42* / G42*			wt	gjd2a Δ5bp / Δ5bp	gjd1b Δ8bp / Δ8bp	gjd2b G42* / G42*	gjd1b Δ8bp / Δ8bp; gjd2b G42* / G42*
	avg. for animal	26.37	2.78	4.49	8.73	9.34		avg. for animal	0.916643	0.0966352	0.156076	0.303462	0.324666
		30.2	2.01	8.39	7.06	8.67			1.04978	0.0698693	0.291643	0.245412	0.301377
		27.59	2.38	9.46	8.47				0.959052	0.0827308	0.328838	0.294424
		31		7.38	6.63				1.07759		0.256535	0.230464
		28.68		7.95	8.23				0.996941		0.276349	0.286082
	avg.	28.768	2.39	7.534	7.824	9.005		avg.	1	0.0830784	0.261888	0.271969	0.313021
	stdev	1.8827	0.385097	1.86447	0.923623	0.473762		stdev	0.0654443	0.0133863	0.0648104	0.0321059	0.0164684
	sterr	0.84197	0.222336	0.833814	0.413057	0.335		sterr	0.0292676	0.00772859	0.0289841	0.0143582	0.0116449
	n	5	3	5	5	2		n	5	3	5	5	2
	M/CoLo - spinal cord
		anti-Cx36 - RAW pixel values							anti-Cx36 - NORMALIZED to wt ave.
			gjd1a Δ8bp / Δ8bp							gjd1a Δ8bp / Δ8bp
		wt	gjd2a Δ5bp / Δ5bp	gjd1b Δ8bp / Δ8bp	gjd2b G42* / G42*	gjd1b Δ8bp / Δ8bp; gjd2b G42* / G42*			wt	gjd2a Δ5bp / Δ5bp	gjd1b Δ8bp / Δ8bp	gjd2b G42* / G42*	gjd1b Δ8bp / Δ8bp; gjd2b G42* / G42*
	avg. for animal	33.19	5.23	5.04	4.36	4.83		avg. for animal	0.928478	0.146307	0.140992	0.121969	0.135117
		37.94	3.96	4.69	3.9	4.06			1.06136	0.11078	0.131201	0.109101	0.113577
		36.11	2.35	5.04	4.85				1.01016	0.0657404	0.140992	0.135677
	avg.	35.7467	3.84667	4.92333	4.37	4.445		avg.	1	0.107609	0.137728	0.122249	0.124347
	stdev	2.39575	1.44334	0.202073	0.475079	0.544472		stdev	0.0670203	0.0403769	0.00565291	0.0132902	0.0152314
	sterr	1.38319	0.833313	0.116667	0.274287	0.385		sterr	0.0386942	0.0233116	0.00326371	0.00767308	0.0107702
	n	3	3	3	3	2		n	3	3	3	3	2
	- for M/CoLo, each avg. for animal represents 12-16 individual M/CoLo synapses
	- for Aud/M, each avg. for animal represents 8-12 individual Aud/M synapses
