# Supplementary material for: A genetic basis for molecular asymmetry at vertebrate electrical synapses
Source: eLife. 2017 May 22;6:e25364. doi: 10.7554/eLife.25364 (PMC5462537; doi:10.7554/eLife.25364)
Supplement: Figure 4—source data 1. — DOI: http://dx.doi.org/10.7554/eLife.25364.010 [file elife-25364-fig4-data1.xlsx]

## Sheet: Fig4 neurobiotin
Fig.4	gjd1afh436 Δ8bp incross	gjd1a 8bp (fh436) het incross
			CoLo / M neurobiotin ratio in each animal					CoLo / M neurobiotin ratio normalized to wt ave.
			wt	cx34.1 Δ8bp / +	cx34.1 Δ8bp / Δ8bp			wt	cx34.1 Δ8bp / +	cx34.1 Δ8bp / Δ8bp
		avg. for animal	0.97	0.82	0.11		avg. for animal	1.06887	0.903581	0.121212
			0.8	0.93	0.12			0.881543	1.02479	0.132231
			0.84	0.99	0.1			0.92562	1.09091	0.110193
			0.72	0.92	0.02			0.793388	1.01377	0.0220386
			1.05	1.31	0.05			1.15702	1.44353	0.0550964
			0.51	0.59	0.02			0.561983	0.650138	0.0220386
			1.5	0.75				1.65289	0.826446
			0.87					0.958678
		avg.	0.9075	0.901429	0.07		avg.	1	0.99331	0.077135
		stdev	0.289322	0.224531	0.045607		stdev	0.318812	0.247417	0.0502557
		sterr	0.102291	0.0848648	0.018619		sterr	0.112717	0.093515	0.0205168
		n	8	7	6		n	8	7	6
	gjd2afh437 Δ5bp incross	gjd2a 5bp (fh437) het incross
			CoLo / M neurobiotin ratio in each animal					CoLo / M neurobiotin ratio normalized to wt ave.
			wt	cx35.5 Δ5bp / +	cx35.5 Δ5bp / Δ5bp			wt	cx35.5 Δ5bp / +	cx35.5 Δ5bp / Δ5bp
		ave. for animal	0.83	0.82	0.1		ave. for animal	0.772606	0.763298	0.0930851
			1.01	0.52	0.06			0.94016	0.484043	0.0558511
			1.37	0.76	0.07			1.27527	0.707447	0.0651596
			1.13	0.65	0.1			1.05186	0.605053	0.0930851
			0.71		0.24			0.660904		0.223404
			1.23		0.05			1.14495		0.0465426
			1.24					1.15426
		avg.	1.07429	0.6875	0.103333		avg.	1	0.63996	0.0961879
		stdev	0.237617	0.132004	0.0700476		stdev	0.221186	0.122876	0.0652039
		sterr	0.0898108	0.0660019	0.0285968		sterr	0.0836005	0.0614379	0.0266194
		n	7	4	6		n	7	4	6
gjd1bfh435 Δ8bp incross or	gjd2bfh456 Δ12bp incross	wt or gjd1b 8bp (fh435) -/- or gjd2b 12bp (fh456) -/- incrosses *
			CoLo / M neurobiotin ratio in each animal					CoLo / M neurobiotin ratio normalized to wt ave.
			wt	cx34.7 Δ8bp / Δ8bp	cx35.1 Δ12bp / Δ12bp			wt	cx34.7 Δ8bp / Δ8bp	cx35.1 Δ12bp / Δ12bp
		ave. for animal	1.15	1.12	1.31		ave. for animal	1.05119	1.02377	1.19744
			1.07	0.95	0.95			0.978062	0.868373	0.868373
			1.02	1.14	1.07			0.932358	1.04205	0.978062
			1.26	1.07	1.11			1.15174	0.978062	1.01463
			0.97	1.13	1.08			0.886654	1.03291	0.987203
		avg.	1.094	1.082	1.104		avg.	1	0.989031	1.00914
		stdev	0.114149	0.0785493	0.130307		stdev	0.104341	0.0718001	0.119111
		sterr	0.051049	0.0351283	0.0582752		sterr	0.0466627	0.03211	0.053268
		n	5	5	5		n	5	5	5
		- each avg. represents 8-12 CoLo cell bodies compared to 2 M cell bodies
		* for this experiment gjd1b/cx34.7 and gjd2b/cx35.1 mutant animals were generated from homozygous mutant adults and compared to wildtypes from a separate cross
