# Supplementary material for: A genetic basis for molecular asymmetry at vertebrate electrical synapses
Source: eLife. 2017 May 22;6:e25364. doi: 10.7554/eLife.25364 (PMC5462537; doi:10.7554/eLife.25364)
Supplement: Figure 5—source data 1. — DOI: http://dx.doi.org/10.7554/eLife.25364.012 [file elife-25364-fig5-data1.xlsx]

## Sheet: Fig5 Cx antibodies
Fig.5						reactivity of antibody against HeLa expressed Cx …				in vivo reactivity on genotypes…			in vivo comments on staining in wt
	gene	protein	peptide target*	species	antibody	zf Cx34.1*	zf Cx34.7*	zf Cx35.1*	zf Cx35.5*	wt	gjd1adis3 /dis3	gjd2aΔ5bp / Δ5bp
Used in Fig.5	gjd1a	Cx34.1	VHPESKDDRECLDLKD	rb	P03_A04	+++	-	-	-	+++	-	-	All areas are marked - fore/mid lateral, mid lateral, mid medial, medial sweep, lateral sweep with blotches, M + hillock, seg homologues, bright down SC and at M/CoLos.
	gjd2a	Cx35.5	ESKELVSSNTKPAK	ms	P04_B12	-	-	-	+++	+++	- some left Aud/M**	-	Bright M circuit, hillocks, seg homologues; clear midbrain spots, fore/mid lateral is weaker; medial and lateral sweeps; strong down SC and at M/CoLos.
commercial antibody from Invitrogen
Used in most Figs.	polyclonal antibody against human Cx36			rb	36-4600	+	+	+	+	+++	- some left Aud/M**	-	Areas marked - fore/mid lateral, mid lateral, mid medial, medial sweep, lateral sweep with blotches, M + hillock, seg homologues, bright down SC and at M/CoLos.
* constructs expressed in HeLa cells were ZfCx34.1-oxGFP-Ctin-N1, ZfCx34.8-EGFP, ZfCx35.1-EGFP, ZfCx35.5-moxGFP-N1
** Cx stain remaining at Aud/M synapse in gjd1a/cx34.1 mutants is consistent with Cx35.5 pairing with an unknown "other" Cx at these synapses; all staining was lost from M/CoLo synapses in these mutants; see text
