# Supplementary material for: A genetic basis for molecular asymmetry at vertebrate electrical synapses
Source: eLife. 2017 May 22;6:e25364. doi: 10.7554/eLife.25364 (PMC5462537; doi:10.7554/eLife.25364)
Supplement: Figure 6—source data 1. — DOI: http://dx.doi.org/10.7554/eLife.25364.014 [file elife-25364-fig6-data1.xlsx]

## Sheet: Fig6 necc. Xplants Aud_M
Fig.6	Presynaptic cell transplanted - Aud/M - hindbrain														Postsynaptic cell transplanted - Aud/M - hindbrain
gjd1afh360 dis3 incross	Cx34.1 is not required presynaptically														Cx34.1 is required postsynaptically
	Xplanted cell	Aud pre													Xplanted cell	M post
	geno. donor	+/+				cx34.1 dis3 / +				cx34.1 dis3 / dis3					geno. donor	+/+				cx34.1 dis3 / +				cx34.1 dis3 / dis3
	geno. host	+/+													geno. host	+/+
	anti-Cx36	GFP+ Xplant associated	GFP- host neighbor	Xplant / host	log2 (Xplant/ host)	GFP+ Xplant associated	GFP- host neighbor	Xplant / host	log2 (Xplant/ host)	GFP+ Xplant associated	GFP- host neighbor	Xplant / host	log2 (Xplant/ host)		anti-Cx36	GFP+ Xplant associated	GFP- host neighbor	Xplant / host	log2 (Xplant/ host)	GFP+ Xplant associated	GFP- host neighbor	Xplant / host	log2 (Xplant/ host)	GFP+ Xplant associated	GFP- host neighbor	Xplant / host	log2 (Xplant/ host)
	avg. for noted	20.16	19.26	1.04673	0.0658879	38.68	45.9	0.842702	-0.246906	28.74	25.22	1.13957	0.188492		avg. for noted	10.25	11.51	0.89053	-0.167264	5.82	5.67	1.02646	0.0376704	1.47	10.41	0.14121	-2.82408
	synapses in	30.37	28.76	1.05598	0.0785832	46.06	50.82	0.906336	-0.141882	53.93	46.93	1.14916	0.200578		synapses in	10.8	11.83	0.912933	-0.131419	5.21	7.93	0.656999	-0.606037	2.13	9.59	0.222106	-2.17068
	animal	27.87	21.12	1.3196	0.400103	27.46	25.89	1.06064	0.0849367	60.06	61.43	0.977698	-0.0325389		animal	14.47	14.84	0.975067	-0.0364262	4.24	6.75	0.628148	-0.670823	11.86	61.33	0.19338	-2.37049
		35.9	40.75	0.880982	-0.182816	33.83	33.47	1.01076	0.0154346	62.93	66.87	0.94108	-0.0876112			14.76	11.6	1.27241	0.347568	7.26	12.69	0.572104	-0.805651	25.18	43.57	0.577921	-0.791057
		52.87	44.56	1.18649	0.2467					66.76	67.38	0.990798	-0.0133365			41.46	44.99	0.921538	-0.117884	56.03	69.9	0.801574	-0.319093	36.48	98.89	0.368895	-1.43872
		29.37	27.54	1.06645	0.0928147					29.2	30.01	0.973009	-0.0394749			77.48	62.34	1.24286	0.313666					17.47	44.61	0.391616	-1.35249
										23.72	23.45	1.01151	0.0165161			46.12	38.52	1.1973	0.259785
	avg.			1.09271	0.116879			0.955109	-0.0721043			1.02612	0.033232		avg.			1.05895	0.0668608			0.737056	-0.472787			0.315855	-1.82459
	stdev			0.147822	0.19572			0.0987385	0.150277			0.0835344	0.114581		stdev			0.17036	0.22944			0.182615	0.33614			0.162186	0.755875
	sterr			0.0603481	0.0799025			0.0493692	0.0751385			0.031573	0.0433077		sterr			0.0643901	0.0867203			0.0816681	0.150326			0.066212	0.308585
	n			6	6			4	4			7	7		n			7	7			5	5			6	6
gjd2afh437 Δ5bp incross	Cx35.5 is required presynaptically														Cx35.5 is not required postsynaptically
	Xplanted cell	Aud pre													Xplanted cell	M post
	geno. donor	+/+				cx35.5 Δ5bp / +				cx35.5 Δ5bp / Δ5bp					geno. donor	+/+				cx35.5 Δ5bp / +				cx35.5 Δ5bp / Δ5bp
	geno. host	+/+													geno. host	+/+
	anti-Cx36	GFP+ Xplant associated	GFP- host neighbor	Xplant / host	log2 (Xplant/ host)	GFP+ Xplant associated	GFP- host neighbor	Xplant / host	log2 (Xplant/ host)	GFP+ Xplant associated	GFP- host neighbor	Xplant / host	log2 (Xplant/ host)		anti-Cx36	GFP+ Xplant associated	GFP- host neighbor	Xplant / host	log2 (Xplant/ host)	GFP+ Xplant associated	GFP- host neighbor	Xplant / host	log2 (Xplant/ host)	GFP+ Xplant associated	GFP- host neighbor	Xplant / host	log2 (Xplant/ host)
	avg. for noted	6.07	5.12	1.18555	0.245553	4.68	5.09	0.91945	-0.121157	0.01	5.11	0.00195695	-8.99718		avg. for noted	31.28	29.99	1.04301	0.060759	6.88	6.43	1.06998	0.0975898	19.93	19.77	1.00809	0.0116288
	synapses in	3.5	4.36	0.802752	-0.316973	5.12	7.62	0.671916	-0.573647	0.06	9.97	0.00601805	-7.37649		synapses in	51.4	56.89	0.903498	-0.146407	17.15	14	1.225	0.292782	23.67	27.69	0.854821	-0.226305
	animal	8.69	7.93	1.09584	0.132035	2.9	3.13	0.926518	-0.11011	0.03	21.14	0.00141911	-9.4608		animal	52.2	55.12	0.947025	-0.0785261	14.07	17.93	0.784718	-0.349753	74.31	81.12	0.91605	-0.126501
		3.39	3.25	1.04308	0.0608456	9.31	12.2	0.763115	-0.390028	0.12	14.32	0.00837989	-6.89885			56.78	51.96	1.09276	0.127981	69.88	80.61	0.86689	-0.206079	62.56	49.99	1.25145	0.323601
		3.27	3.25	1.00615	0.00885092					0.05	6.73	0.00742942	-7.07253			92.2	103.64	0.889618	-0.168742	80.87	104.09	0.776924	-0.364155	42.75	45.66	0.936268	-0.0950064
		6.47	5.11	1.26614	0.340442					1.14	14.43	0.0790021	-3.66197							77.49	96.1	0.806348	-0.310526	47.32	56.14	0.842893	-0.246579
	avg.			1.06659	0.0784589			0.82025	-0.298736			0.0173676	-7.24464		avg.			0.975184	-0.0409869			0.921644	-0.140024			0.968263	-0.0598604
	stdev			0.160402	0.228451			0.124366	0.224369			0.0303282	2.04865		stdev			0.0889934	0.130141			0.184398	0.272557			0.151075	0.209951
	sterr			0.0654839	0.0932645			0.0621831	0.112185			0.0123815	0.836359		sterr			0.0397991	0.0582007			0.0752803	0.111271			0.061676	0.0857122
	n			6	6			4	4			6	6		n			5	5			6	6			6	6
	- Xplant = transplant
	- for Aud/M, each avg. for animal represents 1-6 individual presynaptic or 6 postsynaptic Xplant associated synapses compared to 6-11 host associated synapses
