# Supplementary material for: A genetic basis for molecular asymmetry at vertebrate electrical synapses
Source: eLife. 2017 May 22;6:e25364. doi: 10.7554/eLife.25364 (PMC5462537; doi:10.7554/eLife.25364)
Supplement: Figure 6—source data 2. — DOI: http://dx.doi.org/10.7554/eLife.25364.015 [file elife-25364-fig6-data2.xlsx]

## Sheet: Fig6 necc. Xplants M_CoLo
Fig.6	Presynaptic cell transplanted - M/CoLo - spinal cord														Postsynaptic cell transplanted - M/CoLo - spinal cord														Both pre and post transplanted - M/CoLo - spinal cord
gjd1afh360 dis3 incross	Cx34.1 is not required presynaptically														Cx34.1 is required postsynaptically														Cx34.1 loss from both pre and postsynaptic neurons is not additive
	Xplanted cell	M pre													Xplanted cell	CoLo post													Xplanted cell	M & CoLo
	geno. donor	+/+				cx34.1 dis3 / +				cx34.1 dis3 / dis3					geno. donor	+/+				cx34.1 dis3 / +				cx34.1 dis3 / dis3					geno. donor	+/+				cx34.1 dis3 / +				cx34.1 dis3 / dis3
	geno. host	+/+													geno. host	+/+													geno. host	+/+
	anti-Cx36	GFP+ Xplant associated	GFP- host neighbor	Xplant / host	log2 (Xplant/ host)	GFP+ Xplant associated	GFP- host neighbor	Xplant / host	log2 (Xplant/ host)	GFP+ Xplant associated	GFP- host neighbor	Xplant / host	log2 (Xplant/ host)		anti-Cx36	GFP+ Xplant associated	GFP- host neighbor	Xplant / host	log2 (Xplant/ host)	GFP+ Xplant associated	GFP- host neighbor	Xplant / host	log2 (Xplant/ host)	GFP+ Xplant associated	GFP- host neighbor	Xplant / host	log2 (Xplant/ host)		anti-Cx36	GFP+ Xplant associated	GFP- host neighbor	Xplant / host	log2 (Xplant/ host)	GFP+ Xplant associated	GFP- host neighbor	Xplant / host	log2 (Xplant/ host)	GFP+ Xplant associated	GFP- host neighbor	Xplant / host	log2 (Xplant/ host)
	avg. for noted	18.63	20.33	0.91638	-0.125983	5.65	5.23	1.08031	0.11144	19.22	17.5	1.09829	0.135253		avg. for noted	9.33	9.4	0.992553	-0.0107837	4.65	9.93	0.468278	-1.09456	0.68	16.03	0.0424205	-4.5591		avg. for noted	5.03	5.23	0.961759	-0.0562525	7.32	9.93	0.73716	-0.43995	1.02	22.21	0.0459253	-4.44457
	synapses in	20.15	20.42	0.986778	-0.019203	9.99	12.65	0.789723	-0.340581	7.15	6.59	1.08498	0.117665		synapses in	15.23	14.58	1.04458	0.0629252	3.41	6.25	0.5456	-0.874084	0.98	22.21	0.0441243	-4.50228		synapses in	5.08	5.1	0.996078	-0.00566875	3.38	7.35	0.459864	-1.12072	1.12	14.71	0.0761387	-3.71523
	animal	7.12	7.01	1.01569	0.0224628	22.39	21.87	1.02378	0.0339013	10.01	10.79	0.927711	-0.108253		animal	27.69	27.45	1.00874	0.0125589	2.99	7.35	0.406803	-1.2976	0.33	14.71	0.0224337	-5.47819		animal					7.06	26.79	0.263531	-1.92395	0.55	27.37	0.020095	-5.63702
		7.66	6.56	1.16768	0.223649	21.46	18.86	1.13786	0.18632	7.4	6.93	1.06782	0.0946699			4.57	5.28	0.86553	-0.208344	4.94	11.14	0.443447	-1.17317	1.74	26.86	0.0647803	-3.9483							6.06	10.34	0.586074	-0.770846	0.93	11.66	0.0797599	-3.64819
		6.06	5.23	1.1587	0.212507	15.65	14.35	1.09059	0.125112	3.56	3.54	1.00565	0.00812788			5.78	4.97	1.16298	0.217824	15.11	26.79	0.564016	-0.826191	2	27.37	0.0730727	-3.77452							6.78	12.65	0.535968	-0.89978	0.09	6.59	0.0136571	-6.19421
		5.12	5.1	1.00392	0.00564656	6.58	6.81	0.966226	-0.0495672	5.45	5.53	0.985533	-0.0210233			3.7	3.37	1.09792	0.134777	16.06	24.66	0.651257	-0.618701	0.12	7.47	0.0160643	-5.96							10.01	18.86	0.530753	-0.913888	0.16	6.93	0.023088	-5.43671
						2.23	2.32	0.961207	-0.0570811							3.34	3.75	0.890667	-0.167042	6.19	10.34	0.598646	-0.740225	1.06	10.75	0.0986047	-3.3422
						5.64	6.58	0.857143	-0.222392											9.78	17.73	0.551607	-0.858286	0.37	27.24	0.013583	-6.20206
																				11.3	21.01	0.537839	-0.894753	2.1	21.21	0.0990099	-3.33628
																								0.74	14.21	0.052076	-4.26324
																								0.77	31.12	0.0247429	-5.33684
																								0.15	24.54	0.00611247	-7.35403
	avg.			1.04153	0.0531799			0.988354	-0.026606			1.02833	0.03774		avg.			1.009	0.00598779			0.529722	-0.930841			0.0464187	-4.83809		avg.			0.978919	-0.0309606			0.518892	-1.01152			0.0431106	-4.84599
	stdev			0.100385	0.13783			0.119768	0.181045			0.0665318	0.094638		stdev			0.106254	0.153245			0.0773161	0.216374			0.0319934	1.24479		stdev			0.0242674	0.0357681			0.155743	0.500219			0.0291207	1.0646
	sterr			0.040982	0.056269			0.0423445	0.0640092			0.0271615	0.0386358		sterr			0.0401602	0.0579213			0.025772	0.0721248			0.00923569	0.359341		sterr			0.0171597	0.0252919			0.063582	0.204214			0.0118885	0.434621
	n			6	6			8	8			6	6		n			7	7			9	9			12	12		n			2	2			6	6			6	6
gjd2afh437 Δ5bp incross	Cx35.5 is required presynaptically														Cx35.5 is not required postsynaptically														Cx35.5 loss from both pre and postsynaptic neurons is not additive
	Xplanted cell	M pre													Xplanted cell	CoLo post													Xplanted cell	M & CoLo
	geno. donor	+/+				cx35.5 Δ5bp / +				cx35.5 Δ5bp / Δ5bp					geno. donor	+/+				cx35.5 Δ5bp / +				cx35.5 Δ5bp / Δ5bp					geno. donor	+/+				cx35.5 Δ5bp / +				cx35.5 Δ5bp / Δ5bp
	geno. host	+/+													geno. host	+/+													geno. host	+/+
	anti-Cx36	GFP+ Xplant associated	GFP- host neighbor	Xplant / host	log2( Xplant/ host)	GFP+ Xplant associated	GFP- host neighbor	Xplant / host	log2( Xplant/ host)	GFP+ Xplant associated	GFP- host neighbor	Xplant / host	log2( Xplant/ host)		anti-Cx36	GFP+ Xplant associated	GFP- host neighbor	Xplant / host	log2( Xplant/ host)	GFP+ Xplant associated	GFP- host neighbor	Xplant / host	log2( Xplant/ host)	GFP+ Xplant associated	GFP- host neighbor	Xplant / host	log2( Xplant/ host)		anti-Cx36	GFP+ Xplant associated	GFP- host neighbor	Xplant / host	log2( Xplant/ host)	GFP+ Xplant associated	GFP- host neighbor	Xplant / host	log2( Xplant/ host)	GFP+ Xplant associated	GFP- host neighbor	Xplant / host	log2( Xplant/ host)
	avg. for noted	6.59	6.52	1.01074	0.0154065	6.49	8.17	0.79437	-0.332118	1.2	17.36	0.0691244	-3.85466		avg. for noted	16.78	15.98	1.05006	0.0704753	9.24	8.63	1.07068	0.0985323	13.29	13.28	1.00075	0.00108596		avg. for noted	6.49	6.52	0.995399	-0.00665349	n.d.	n.d.	n.d.	n.d.	0.05	6.41	0.00780031	-7.00225
	synapses in	9.03	8.89	1.01575	0.0225426	9.11	13.5	0.674815	-0.567436	0.78	12.59	0.0619539	-4.01266		synapses in	12.69	13.79	0.920232	-0.11993	14.02	13.77	1.01816	0.0259578	16.22	15.1	1.07417	0.103225		synapses in	8.3	8.59	0.96624	-0.0495468					0.16	3.21	0.0498442	-4.32643
	animal	8.75	9.42	0.928875	-0.106444	10.55	13.97	0.75519	-0.405089	0.14	9.07	0.0154355	-6.0176		animal	13.75	12.51	1.09912	0.13635	12.62	11.76	1.07313	0.101824	10.97	10.41	1.05379	0.0755935		animal	6.11	6.75	0.905185	-0.143715
		9.92	8.35	1.18802	0.248564	3.15	4.34	0.725806	-0.462343	0.22	8.59	0.0256112	-5.28708			4.16	4.32	0.962963	-0.0544478	12.92	12.19	1.05989	0.0839079	16.44	15.16	1.08443	0.116941
		8.44	8.59	0.982538	-0.0254151	5.89	7.69	0.76593	-0.384716	0.18	6.41	0.0280811	-5.15426			5.75	6.19	0.928918	-0.106377	12.22	12.57	0.972156	-0.0407404	17.35	16.69	1.03954	0.0559517
		6.72	6.75	0.995556	-0.00642627					1.36	9.37	0.145144	-2.78444							13.5	14.11	0.956768	-0.0637586	15.65	16.47	0.950213	-0.0736779
										0.37	3.21	0.115265	-3.11698							11.61	11.37	1.02111	0.0301357	15.36	15.93	0.964218	-0.0525681
										0.61	5.79	0.105354	-3.24668							13.41	13.88	0.966138	-0.0496983	11.83	14.12	0.837819	-0.25529
										0.45	6.22	0.0723473	-3.78892							15.24	15	1.016	0.0229004	15.76	14.2	1.10986	0.150377
																				13.76	13.47	1.02153	0.0307306	11.7	13.87	0.843547	-0.245459
																								16.49	15.2	1.08487	0.11752
																								11.6	11.48	1.01045	0.0150022
																								11.84	12.93	0.9157	-0.127053
																								17.08	15.13	1.12888	0.174896
																								9.62	10.01	0.961039	-0.0573332
																								10.08	10.33	0.975799	-0.0353446
																								12.81	12.8	1.00078	0.00112667
	avg.			1.02025	0.0247046			0.743222	-0.43034			0.070924	-4.14036		avg.			0.992259	-0.0147861			1.01756	0.0239791			1.00211	-0.00205928		avg.			0.955608	-0.0666385							0.0288223	-5.66434
	stdev			0.0879094	0.119067			0.0454362	0.0897029			0.0443193	1.10527		stdev			0.0787702	0.113059			0.0423399	0.0601968			0.0854235	0.126154		stdev			0.0460369	0.0701111							0.0297295	1.89209
	sterr			0.0358889	0.0486091			0.0203197	0.0401164			0.0147731	0.368423		sterr			0.0352271	0.0505613			0.013389	0.0190359			0.0207182	0.0305969		sterr			0.0265794	0.0404787							0.021022	1.33791
	n			6	6			5	5			9	9		n			5	5			10	10			17	17		n			3	3							2	2
	- Xplant = transplant
	- for M/CoLo, each avg. for animal represents 8 individual presynaptic or 1-8 postsynaptic Xplant associated synapses compared to 8-12 host associated synapses
	- n.d. = not determined
