# Supplementary material for: A genetic basis for molecular asymmetry at vertebrate electrical synapses
Source: eLife. 2017 May 22;6:e25364. doi: 10.7554/eLife.25364 (PMC5462537; doi:10.7554/eLife.25364)
Supplement: Figure 7—source data 1. — DOI: http://dx.doi.org/10.7554/eLife.25364.017 [file elife-25364-fig7-data1.xlsx]

## Sheet: Fig7 suff. Xplants Aud_M
Fig.7	Postsynaptic cell transplanted - Aud/M - spinal cord
gjd1afh360 dis3 incross	Cx34.1 is sufficient postsynaptically
	Xplanted cell	M post
	geno. donor	+/+
	geno. host	+/+			cx34.1 dis3 / +				cx34.1 dis3 / dis3
	anti-Cx36	GFP+ Xplant associated	GFP- host neighbor	Xplant / host	GFP+ Xplant associated	GFP- host neighbor	Xplant / host	log2 (Xplant/ host)	GFP+ Xplant associated	GFP- host neighbor	Xplant / host	log2 (Xplant/ host)
	avg. for noted	n.d.	n.d.	n.d.	n.d.	n.d.	n.d.	n.d.	5.37	1.09	4.92661	2.30059
	synapses in								15.05	3.41	4.41349	2.14192
	animal								15.1	2.81	5.37367	2.42591
									6.63	1.02	6.5	2.70044
									10.91	1.5	7.27333	2.86262
									4.84	1.23	3.93496	1.97635
									9.33	1.77	5.27119	2.39813
	avg.										5.38475	2.40085
	stdev										1.16037	0.305755
	sterr										0.438577	0.115564
	n										7	7
cx35.5fh437 Δ5bp incross	Cx35.5 is not sufficient postsynaptically
	Xplanted cell	CoLo post
	geno. donor	+/+
	geno. host	+/+			cx35.5 Δ5bp / +				cx35.5 Δ5bp / Δ5bp
	anti-Cx36	GFP+ Xplant associated	GFP- host neighbor	Xplant / host	GFP+ Xplant associated	GFP- host neighbor	Xplant / host	log2 (Xplant/ host)	GFP+ Xplant associated	GFP- host neighbor	Xplant / host	log2 (Xplant/ host)
	avg. for noted	n.d.	n.d.	n.d.	n.d.	n.d.	n.d.	n.d.	0.04	0.03	1.33333	0.415037
	synapses in								0.73	0.86	0.848837	-0.23644
	animal								0.54	0.67	0.80597	-0.311202
									0.53	0.55	0.963636	-0.0534393
									0.04	0.03	1.33333	0.415037
	avg.										1.05702	0.0457988
	stdev										0.25874	0.349868
	sterr										0.115712	0.156466
	n										5	5
	- Xplant = transplant
	- for Aud/M, each avg. for animal represents 1-6 individual presynaptic or 6 postsynaptic Xplant associated synapses compared to 6-11 host associated synapses
	- n.d. = not determined
