# Supplementary material for: A genetic basis for molecular asymmetry at vertebrate electrical synapses
Source: eLife. 2017 May 22;6:e25364. doi: 10.7554/eLife.25364 (PMC5462537; doi:10.7554/eLife.25364)
Supplement: Figure 7—source data 2. — DOI: http://dx.doi.org/10.7554/eLife.25364.018 [file elife-25364-fig7-data2.xlsx]

## Sheet: Fig7 suff. Xplants M_CoLo
Fig.7	Presynaptic cell transplanted - M/CoLo - spinal cord													Postsynaptic cell transplanted - M/CoLo - spinal cord													Both pre and post transplanted - M/CoLo - spinal cord
gjd1afh360 dis3 incross	Cx34.1 is not sufficent presynaptically													Cx34.1 is sufficient postsynaptically													Cx34.1 rescue from both pre and postsynaptic neurons is not additive
	Xplanted cell	M pre												Xplanted cell	CoLo post												Xplanted cell	M & CoLo
	geno. donor	+/+												geno. donor	+/+												geno. donor	+/+
	geno. host	+/+			cx34.1 dis3 / +				cx34.1 dis3 / dis3					geno. host	+/+			cx34.1 dis3 / +				cx34.1 dis3 / dis3					geno. host	+/+			cx35.5 Δ5bp / +				cx35.5 Δ5bp / Δ5bp
	anti-Cx36	GFP+ Xplant associated	GFP- host neighbor	Xplant / host	GFP+ Xplant associated	GFP- host neighbor	Xplant / host	log2 (Xplant/ host)	GFP+ Xplant associated	GFP- host neighbor	Xplant / host	log2 (Xplant/ host)		anti-Cx36	GFP+ Xplant associated	GFP- host neighbor	Xplant / host	GFP+ Xplant associated	GFP- host neighbor	Xplant / host	log2 (Xplant/ host)	GFP+ Xplant associated	GFP- host neighbor	Xplant / host	log2 (Xplant/ host)		anti-Cx36	GFP+ Xplant associated	GFP- host neighbor	Xplant / host	GFP+ Xplant associated	GFP- host neighbor	Xplant / host	log2 (Xplant/ host)	GFP+ Xplant associated	GFP- host neighbor	Xplant / host	log2 (Xplant/ host)
	avg. for noted	n.d.	n.d.	n.d.	2.95	3.47	0.850144	-0.234221	0.23	0.27	0.851852	-0.231326		avg. for noted	n.d.	n.d.	n.d.	5.59	3.23	1.73065	0.791314	8.14	0.25	32.56	5.02503		avg. for noted	n.d.	n.d.	n.d.	6.49	4.24	1.53066	0.614154	5.35	0.25	21.4	4.41954
	synapses in				5.14	4.8	1.07083	0.098734	0.18	0.16	1.125	0.169925		synapses in				10.75	6.13	1.75367	0.810378	7.85	0.27	29.0741	4.86166		synapses in				3.49	1.71	2.04094	1.02923	8.3	0.16	51.875	5.69697
	animal				6.11	5.1	1.2	0.263034	0.14	0.13	1.07692	0.106915		animal				7.51	4.5	1.66889	0.738888	12.52	0.26	48.1538	5.58958		animal								8.95	0.18	49.7222	5.63582
					4.03	3.62	1.11326	0.15479	0.21	0.25	0.84	-0.251539						6.35	3.62	1.75414	0.810767	9.41	0.14	67.2143	6.0707
					2.67	3.15	0.847619	-0.238512	0.28	0.38	0.736842	-0.440573						4.11	2.31	1.77922	0.831246	7.59	0.18	42.1667	5.39803
					4.25	2.76	1.53986	0.622795	0.09	0.12	0.75	-0.415037										9	0.11	81.8182	6.35435
									0.22	0.13	1.69231	0.758992										11.79	0.28	42.1071	5.39599
																						4.53	0.11	41.1818	5.36394
	avg.						1.10362	0.111103			1.01042	-0.0432346		avg.						1.73731	0.796518			48.0345	5.50741		avg.						1.7858	0.821692			40.9991	5.25078
	stdev						0.257117	0.325101			0.336495	0.425526		stdev						0.0419325	0.0351761			17.8273	0.497995		stdev						0.360819	0.293503			17.0074	0.720521
	sterr						0.104967	0.132722			0.127183	0.160834		sterr						0.0187528	0.0157312			6.30292	0.176068		sterr						0.255138	0.207538			9.81922	0.415993
	n						6	6			7	7		n						5	5			8	8		n						2	2			3	3
cx35.5fh437 Δ5bp incross	Cx35.5 is sufficent presynaptically													Cx35.5 is not sufficient postsynaptically													Cx35.5 rescue in both pre and postsynaptic neurons is not additive
	Xplanted cell	M pre												Xplanted cell	CoLo post												Xplanted cell	M & CoLo
	geno. donor	+/+												geno. donor	+/+												geno. donor	+/+
	geno. host	+/+			cx35.5 Δ5bp / +				cx35.5 Δ5bp / Δ5bp					geno. host	+/+			cx35.5 Δ5bp / +				cx35.5 Δ5bp / Δ5bp					geno. host	+/+			cx35.5 Δ5bp / +				cx35.5 Δ5bp / Δ5bp
	anti-Cx36	GFP+ Xplant associated	GFP- host neighbor	Xplant / host	GFP+ Xplant associated	GFP- host neighbor	Xplant / host	log2 (Xplant/ host)	GFP+ Xplant associated	GFP- host neighbor	Xplant / host	log2 (Xplant/ host)		anti-Cx36	GFP+ Xplant associated	GFP- host neighbor	Xplant / host	GFP+ Xplant associated	GFP- host neighbor	Xplant / host	log2 (Xplant/ host)	GFP+ Xplant associated	GFP- host neighbor	Xplant / host	log2 (Xplant/ host)		anti-Cx36	GFP+ Xplant associated	GFP- host neighbor	Xplant / host	GFP+ Xplant associated	GFP- host neighbor	Xplant / host	log2 (Xplant/ host)	GFP+ Xplant associated	GFP- host neighbor	Xplant / host	log2 (Xplant/ host)
	avg. for noted	n.d.	n.d.	n.d.	3.49	2.22	1.57207	0.652667	8.6	0.66	13.0303	3.7038		avg. for noted	n/d			8.11	7.96	1.01884	0.0269335	0.24	0.26	0.923077	-0.115477		avg. for noted	n.d.	n.d.	n.d.	5.68	3.16	1.79747	0.845966	7.11	0.95	7.48421	2.90385
	synapses in				6.45	6.84	0.942982	-0.0846972	8.42	0.57	14.7719	3.88479		synapses in				7.06	7.13	0.990182	-0.0142339	0.57	0.49	1.16327	0.21818		synapses in								2.03	0.05	40.6	5.34341
	animal				6.82	3.26	2.09202	1.0649	11.86	0.75	15.8133	3.98307		animal				8.8	7.48	1.17647	0.234465	0.57	0.41	1.39024	0.475338		animal								0.86	0.03	28.6667	4.8413
					7.18	3.37	2.13056	1.09124	10.85	0.65	16.6923	4.06111						9.79	6.32	1.54905	0.631384	0.43	0.42	1.02381	0.0339473										1.81	0.06	30.1667	4.91488
					10.46	6.25	1.6736	0.742955	7.2	0.4	18	4.16993						3.74	3.61	1.03601	0.0510394	1	0.83	1.20482	0.268817
					5.6	3.32	1.68675	0.754244	11.86	0.39	30.4103	4.92649						3.97	3.63	1.09366	0.129169	0.48	0.62	0.774194	-0.369234
					13.42	10.27	1.30672	0.385948	5.28	0.19	27.7895	4.79647						13.43	7.83	1.7152	0.778375	0.76	0.75	1.01333	0.0191088
					6.95	3.94	1.76396	0.818817	6.66	0.21	31.7143	4.98706						2.47	2.95	0.837288	-0.256204	0.3	0.27	1.11111	0.152003
					3.34	1.63	2.04908	1.03498	10.24	0.31	33.0323	5.0458						2.14	1.89	1.13228	0.179225	0.02	0.02	1	0
					6.65	4.04	1.64604	0.718999	9.92	0.47	21.1064	4.39961						4.99	6.4	0.779687	-0.359032	0.01	0.02	0.5	-1
																		3.03	3.16	0.958861	-0.0606068	0.1	0.06	1.66667	0.736966
																						0.04	0.1	0.4	-1.32193
																						0.81	0.95	0.852632	-0.230006
	avg.						1.68638	0.718004			22.2361	4.39581		avg.						1.11705	0.121865			1.00178	-0.0870988		avg.						1.79747	0.845966			26.7294	4.50086
	stdev						0.366827	0.354506			7.71519	0.504166		stdev						0.282511	0.338627			0.337517	0.560134		stdev						n.a.	n.a.			13.8845	1.08745
	sterr						0.116001	0.112105			2.43976	0.159431		sterr						0.0851804	0.1021			0.0936104	0.155353		sterr						n.a.	n.a.			6.94225	0.543725
	n						10	10			10	10		n						11	11			13	13		n						1	1			4	4
	- Xplant = transplant
	- for M/CoLo, each ave. for animal represents 8 individual presynaptic or 1-8 postsynaptic Xplant associated synapses compared to 8-12 host associated synapses
	- n.d. = not determined
