# Supplementary material for: A genetic basis for molecular asymmetry at vertebrate electrical synapses
Source: eLife. 2017 May 22;6:e25364. doi: 10.7554/eLife.25364 (PMC5462537; doi:10.7554/eLife.25364)
Supplement: Figure 8—source data 1. — DOI: http://dx.doi.org/10.7554/eLife.25364.020 [file elife-25364-fig8-data1.xlsx]

## Sheet: Fig8 behavior
Fig.8	SLC react %						SLC latency						SLC angle						SLC max. angular velocity
		gjd1a wt sibs	gjd1a Δ8bp / Δ8bp	gjd2a wt sibs	gjd2a Δ5bp / Δ5bp			gjd1a wt sibs	gjd1a Δ8bp / Δ8bp	gjd2a wt sibs	gjd2a Δ5bp / Δ5bp		bin	gjd1a wt sibs	gjd1a Δ8bp / Δ8bp	gjd2a wt sibs	gjd2a Δ5bp / Δ5bp		bin	gjd1a wt sibs	gjd1a Δ8bp / Δ8bp	gjd2a wt sibs	gjd2a Δ5bp / Δ5bp
	avg. # SLC	20	90	100	70		time (ms) of	4	7	6	9		<30	0	1.86335	0	1.11111		<18	2.71739	16.7742	3.18471	12.069
	in 10 trials*	100	100	100	60		first move-	6	9	8	16		30-50	0.531915	5.59006	2.90698	6.11111		19-20	7.06522	14.8387	14.0127	9.1954
	per animal	90	100	87.5	40		ment after	7	8	4	8		50-70	0	8.07453	1.74419	6.66667		21-22	14.6739	12.2581	31.2102	17.8161
		80	100	100	70		stimuls	6	8	5	7		70-90	4.78723	8.69565	5.23256	5.55556		23-24	27.7174	21.2903	19.7452	24.1379
		90	80	70	22.2			7	7	11	10		90-110	9.57447	8.69565	18.0233	8.33333		25-26	20.1087	15.4839	14.6497	15.5172
		80	100	80	100			7	8	3	7		110-130	33.5106	15.528	38.9535	21.6667		27-28	10.3261	5.80645	6.36943	8.04598
		70	100	30	70			10	7	4	17		130-150	31.383	27.9503	21.5116	29.4444		29-30	6.52174	4.51613	3.82166	1.72414
		100	90	100	75			5	8	3	7		150-170	11.1702	13.6646	8.13953	11.6667		31-32	4.8913	3.22581	2.54777	1.14943
		100	70	66.7	50			9	6	5	10		170-190	4.25532	3.72671	2.32558	6.11111		33-34	2.17391	0.645161	0	1.72414
		20	80	90	80			8	12	8	8		190-210	2.65957	2.48447	0.581395	1.66667		35-36	0.543478	0	0.636943	1.14943
		40	90	40	71.4			7	8	13	10		>210	2.12766	3.72671	0.581395	1.66667		>37	3.26087	5.16129	3.82166	7.47126
		100	100	100	77.8			4	12	7	9		total	100	100	100	100		total	100	100	100	100
		90	100	70	55.6			6	5	5	5
		100	55.6	80	80			7	5	8	6
		90	50	77.8	33.3			4	14	6	7
		100	88.9	87.5	66.7			5	13	12	6
		100	90	100	33.3			6	6	6	9
		60	70	20	28.6			4	15	10	7
		80	100	60	100			8	5	12	6
		100	40	80	100			5	5	8	9
		37.5		44.4	100			8	6	5	8
		100		100	66.7			6	7	8	9
		11.1		100	100			5	5	10	9
		30		50	60			6	10	6	4
		70		55.6	87.5			6	8	9	7
		100			87.5			7	5	7	8
		70			90			8	8	5	5
					90			9	13	7	7
					10			8	5	9	6
	avg.	75.1333	84.725	75.58	68.1241			8	14	6	7
	stdev	29.2956	18.536	24.2972	25.439			8	13	7	7
	sterr	5.63793	4.14477	4.85945	4.7239			7	15	8	6
	n	27	20	25	29			6	6	4	8
								8	9	3	8
	* some trials are excluded if software cannot track movement**							9	9	6	12
	** generally due to interference with the wall of the chamber							6	9	7	7
								10	7	6	9
								8	9	7	6
								5	9	8	6
								6	6	8	10
								9	6	7	9
								6	10	6	14
								11	16	5	8
								16	7	7	10
								6	15	6	7
								8	6	7	15
								8	7	5	10
								6	12	4	8
								7	13	8	14
								7	11	9	14
								6	5	10	10
								4	5	7	5
								8	6	4	7
								6	14	4	8
								7	9	8	12
								5	6	7	10
								5	8	11	7
								8	10	9	9
								9	13	9	6
								9	8	6	9
								7	10	6	11
								8	16	8	8
								8	11	10	9
								6	12	7	5
								5	7	5	9
								8	5	4	9
								6	5	9	10
								9	8	6	9
								7	9	9	8
								8	9	4	7
								10	7	8	7
								9	10	6	6
								10	8	4	6
								10	12	9	8
								6	8	9	14
								7	4	7	6
								5	9	6	10
								3	7	9	5
								6	11	9	9
								7	9	9	9
								3	6	7	11
								9	12	6	9
								3	5	8	8
								5	10	6	8
								7	5	10	12
								8	8	7	8
								4	6	7	8
								10	4	5	10
								7	5	8	7
								5	5	4	7
								6	12	9	8
								4	9	9	16
								8	13	7	8
								8	6	6	12
								12	12	5	15
								9	14	3	9
								5	9	12	7
								11	8	5	9
								9	8	9	9
								11	9	5	9
								8	8	6	9
								7	8	5	11
								9	8	5	10
								6	10	8	7
								9	12	8	10
								4	10	8	8
								8	11	8	14
								6	9	5	8
								8	11	10	12
								5	10	7	8
								8	8	5	7
								7	8	4	8
								8	5	9	7
								9	4	4	7
								6	9	9	10
								5	8	3	12
								5	10	11	8
								6	9	7	12
								5	10	10	9
								6	8	11	11
								7	8	10	9
								7	9	6	9
								8	11	7	10
								5	8	10	8
								9	8	10	13
								7	8	8	7
								2	6	4	10
								6	7	9	8
								7	7	11	7
								11	5	3	7
								8	4	11	9
								8	5	4	12
								6	6	4	8
								5	10	5	15
								7	6	7	9
								6	9	8	6
								8	13	5	8
								8	8	4	7
								10	14	4	8
								6	15	4	6
								6	17	8	6
								5	11	4	9
								7	14	10	13
								4	6	8	8
								8	7	10	15
								7	15	9	8
								7	7	6	11
								6	11	8	8
								7	13	7	6
								5	7	8	7
								7	10	5	12
								4	5	9	10
								6	6	7	9
								6	11	5	6
								7	12	8	12
								8	14	8	8
								7	12	6	16
								9	8	10	6
								7	11	9	8
								6	16	6	11
								8		8	6
								10		7	8
								6		3	16
								10		7	14
								9		14	9
								6		16	9
								8		10	14
								7		11	11
								3		10	14
								6		14	12
								4		8	7
								7		10	7
								6			6
								8			10
								7			11
								4			8
								7			9
								8			13
								6			10
								9			13
								10
								9
								10
								7
								10
								9
							avg.	7.03226	8.91875	7.25	9.05
							stdev	1.95877	3.06116	2.45694	2.63681
							sterr	0.143624	0.242006	0.18734	0.196537
							n	186	160	172	180
